# Supplementary material
Source: Springer Nature journal article supplement (https://www.springermedizin.de/resource/supplementary/12889_2014_6921_MOESM1_ESM.pdf/9499298)
Supplement: MOESM1 [file 9499298]

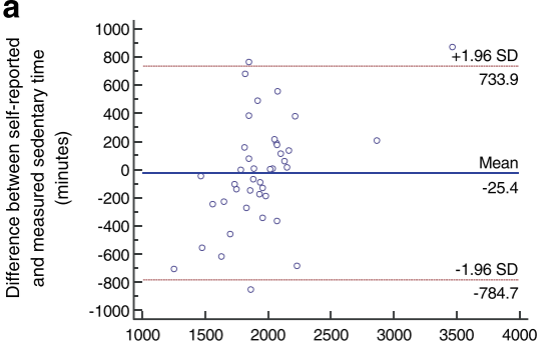

Mean of self-reported and measured sedentary time (minutes)

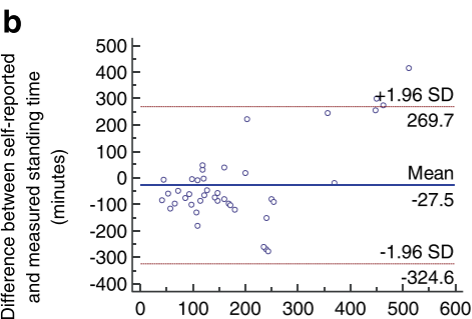

Mean of self-reported and measured standing time (minutes)

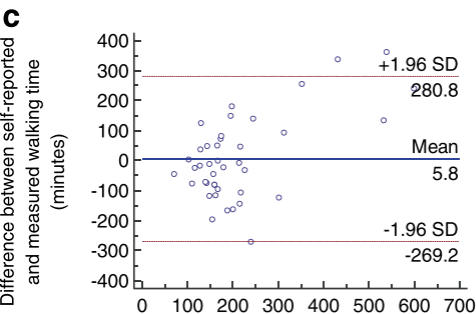

Mean of self-reported and measured walking time (minutes)
